# Supplementary material
Source: Springer Nature journal article supplement (https://www.springermedizin.de/resource/supplementary/12967_2011_972_MOESM5_ESM.pdf/9573172)

## ERBB2/HER2

## TOP2A/Topolla

gene

RNA

protein

gene

RNA

protein

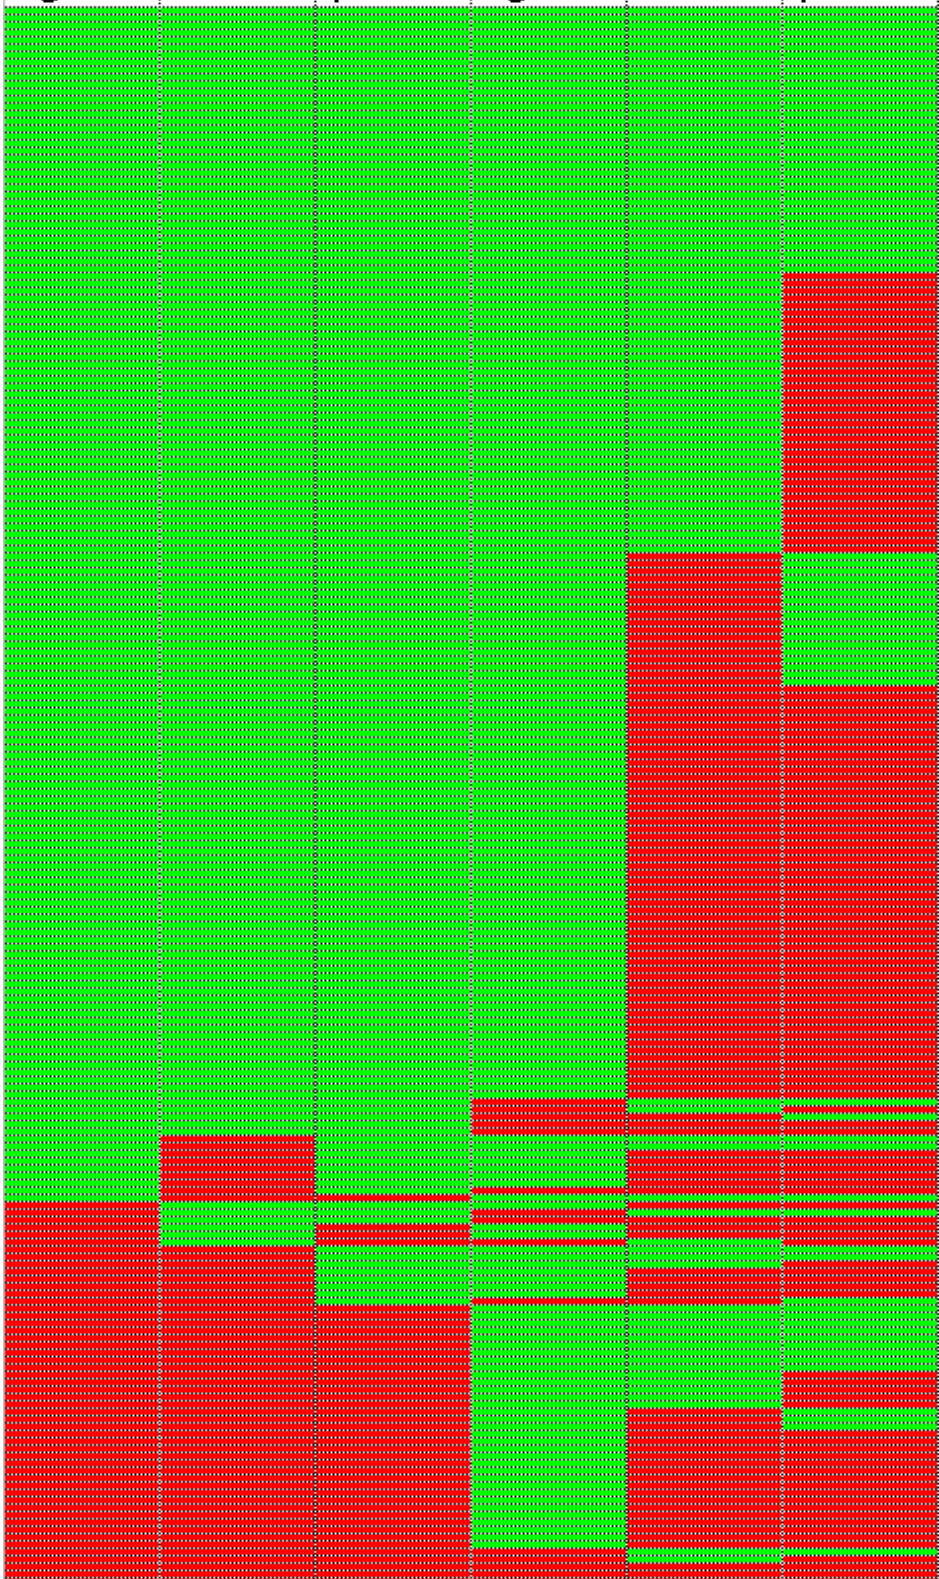

Supplement: MOESM5 [file 9573172]
